# Supplementary material for: Fluorescent Aptasensor for Highly Specific Detection of ATP Using a Newly Screened Aptamer
Source: MDPI journal article supplement (doi:10.3390/s22072425), 2022-03-22
Supplement: s1 [file s1]

## **Supplementary Information**

### **Fluorescent aptasensor for highly specific detection of ATP using a newly screened aptamer**

Xin Chen<sup>1,#</sup>, Yangkun Feng<sup>2,#</sup>, Haohan Chen<sup>1</sup>, Yuting Zhang<sup>1</sup>, Xiaoli Wang<sup>1</sup> and

Nandi Zhou<sup>1,\*</sup>

<sup>1</sup> The Key Laboratory of Carbohydrate Chemistry and Biotechnology, Ministry of Education, School of Biotechnology, Jiangnan University, Wuxi 214122, China

<sup>2</sup> Medical College of Nantong University, Nantong 226007, China

<sup>#</sup> These authors contribute equally.

<sup>\*</sup> Correspondence: zhounandi@jiangnan.edu.cn (N.Z.); Tel.: +86-510-85197831

## **Aptamer selection**

Screening of ATP-specific aptamers was performed using DNA library-immobilized magnetic beads-based SELEX. PCR amplification of the initial library was performed using primer1 and primer2. The PCR amplification system includes 9.5  $\mu\text{L}$  ddH<sub>2</sub>O, 12.5  $\mu\text{L}$  2 $\times$ PrimeSTARMax Premix, 1  $\mu\text{L}$  primer1 (10  $\mu\text{M}$ ), 1  $\mu\text{L}$  primer2 (10  $\mu\text{M}$ ), with 1  $\mu\text{L}$  initial ssDNA library (1  $\mu\text{M}$ ). The PCR amplification was carried out at 95°C, 5 min; 95°C, 30 s; 55°C, 30 s; 72°C, 15 s; 72°C, 5 min; 15 cycles. In order to retain the activity of the streptavidin-modified magnetic beads, they were washed 5 times with 1 mL of 10 mM PBS buffer (137 mM NaCl, 2.7 mM KCl, pH 7.4) for 5 min before each use. The washed magnetic beads can be stored at 4°C in the refrigerator. During the first round of the screening, 100  $\mu\text{L}$  of PCR product was diluted with 100  $\mu\text{L}$  of binding buffer (50 mM Tris-HCl, 5 mM KCl, 100 mM NaCl, 1 mM MgCl<sub>2</sub>, pH 7.4), followed by addition of 50  $\mu\text{L}$  activated magnetic beads. After two hours of gentle shaking at room temperature, the mixture was placed on a magnetic separator. The supernatant was discarded, and the binding buffer was used to wash the beads 5 times to eliminate the double-stranded DNA uncoupled on the beads. Subsequently, 3  $\mu\text{L}$  of 100 mM ATP was added and continued to incubate for 2 h at 25°C, followed by placing on a magnetic separator for 3 min. And the supernatant was collected as the secondary library for the next screening round. As the number of screening rounds increased, the concentration of ATP was gradually reduced to increase the screening pressure in order to get high-affinity aptamers. At the same time, in order to improve the specificity of aptamers, counter screening was

introduced since the seventh round. During counter screening, ADP and AMP with the same concentration of ATP were added and incubated with double-stranded DNA-coupled magnetic beads for 2 h. Following magnetic separation, the supernatant was eliminated and then ATP was added for further incubation. After three rounds of continuous counter screening and one round of positive screening, the selection was finished.

**Table S1.** All DNA sequences used in this work.

| Name                           | Sequences (5'-3')                                                      |
|--------------------------------|------------------------------------------------------------------------|
| Initial ssDNA library          | TAGGGAATTCGTCGACGGATCC-N35-CTGCAGGTC<br>GACGCATGCGCCG                  |
| Primer1                        | TAGGGAATTCGTCGACGGAT                                                   |
| Primer2                        | biotin-CGGCGCATGCGTCGACCTG                                             |
| ATP aptamer                    | TGGCGTCTGCATGCAGGTCGACGCATGCGCCG                                       |
| Classic ATP aptamer            | ACCTGGGGGAGTATTGCGGAGGAAGGT [1]                                        |
| Functional chimera sequence    | <i>TGGCGTCTGCATGCAGGTCGACGCATGCGCCGCCT</i><br><b><u>GAGCTTAGAT</u></b> |
| FAM-labeled functional chimera | FAM-TGGCGTCTGCATGCAGGTCGACGCATGCGC<br>sequence<br>CGCCTGAGCTTAGAT      |
| Primer3                        | ATCTAAGC                                                               |
| Molecular beacon               | FAM-TCAGGCGGCGTTTTTTTTTGGTCGACGCATGC<br>GCCGCCTGA-dabcyl               |

The italicized letters in the functional chimera sequence represent the aptamer region and the bold letters represent the complementary sequence of the Nb.bpu10I endonuclease cleavage site. The underlined letters represent the complementary sequences of the primer.

**Table S2.** The significance test of the affinities of the screened aptamer for ATP, ADP and AMP.

### Descriptives

|       |   | 95% Confidence Interval<br>for Mean |                   |               |                |                |         |         |
|-------|---|-------------------------------------|-------------------|---------------|----------------|----------------|---------|---------|
|       | N | Mean                                | Std.<br>Deviation | Std.<br>Error | Lower<br>Bound | Upper<br>Bound | Minimum | Maximum |
| ATP   | 3 | 161.6667                            | 10.50397          | 6.06447       | 135.5734       | 187.7600       | 151.00  | 172.00  |
| ADP   | 3 | 67.6667                             | 6.42910           | 3.71184       | 51.6959        | 83.6374        | 63.00   | 75.00   |
| AMP   | 3 | 34.6667                             | 6.65833           | 3.84419       | 18.1265        | 51.2069        | 27.00   | 39.00   |
| Total | 9 | 88.0000                             | 57.49565          | 19.16522      | 43.8049        | 132.1951       | 27.00   | 172.00  |

Descriptives is a statistical method to conduct the basic information statistics of nine data in three groups of ATP, ADP and AMP, including the number of examples, mean, standard deviation and other information for each group.

### ANOVA

|                | Sum of Squares | df | Mean Square | F       | Sig. |
|----------------|----------------|----|-------------|---------|------|
| Between Groups | 26054.000      | 2  | 13027.000   | 199.393 | .000 |
| Within Groups  | 392.000        | 6  | 65.333      |         |      |
| Total          | 26446.000      | 8  |             |         |      |

ANOVA is a statistical method to analyze whether the data between each group is significantly different. Under the assumption of homogeneity of variance, within the 95% confidence interval, the difference between the affinities of the screened aptamer for ATP, ADP and AMP is statistically significant ( $F = 199.393$ ,  $P < 0.001$ ).

**Table S3.** The comparison of the performance between the aptasensor in this study and the commercially available methods.

| Name                                | Method                       | Sensitivity         | Selectivity  | Manufacturer   |
|-------------------------------------|------------------------------|---------------------|--------------|----------------|
| The aptasensor in this study        | Fluorescent                  | 33.85 nM            | Good         |                |
| PhosphoWorks™                       | Bioluminescence              | 0.4 μM              | Not reported | AAT Bioquest   |
| Fluorimetric ATP Assay Kit          |                              |                     |              |                |
| ATP Assay Kit                       | Colorimetric/Bioluminescence | 1 μM                | Not reported | Abcam          |
| ATP Bioluminescence Kit             | Bioluminescence              | 1 nM-10 μM          | Not reported | Sigama-Aldrich |
| ATP Bioluminescence Assay Kit HS II | Bioluminescence              | 10 <sup>-12</sup> M | Not reported | Sigama-Aldrich |
| ATP Assay Kit                       | Bioluminescence              | 10 μM               | Not reported | Beyotime       |
| ATP Content Assay Kit               | Micromethod                  | 2.6 μM              | Not reported | Solarbio       |
| ATP Content Assay Kit               | Colorimetric                 | 2.3 μM              | Not reported | Solarbio       |
| ATP Content Assay Kit               | Colorimetric                 | 3 μM                | Not reported | Boxbio         |
| ATP Content Assay Kit               | Colorimetric                 | 2.3 μM              | Not reported | Sangon Biotech |
| ATP Content Assay Kit               | Micromethod                  | 2.6 μM              | Not reported | Sangon Biotech |

## Reference

1. Huizenga, D.E.; Szostak, J.W. A DNA aptamer that binds adenosine and ATP. *Biochemistry* **1995**, *34*, 656-665, 10.1021/bi00002a033.
